# Supplementary material for: The effect of biosolid/soil composition on growth and uptake of zinc (Zn) by broccoli (Brassica oleracea var.) under greenhouse conditions
Source: Royal Society of Chemistry journal article supplement (doi:10.1039/d4va00266k), 2025-01-01

Figure S1: Fast maps showing the distribution of elements C, O, F, Na, Mg, Al, Si, P, S, Cl, K, Ca, Ti, Fe in sludge sample.

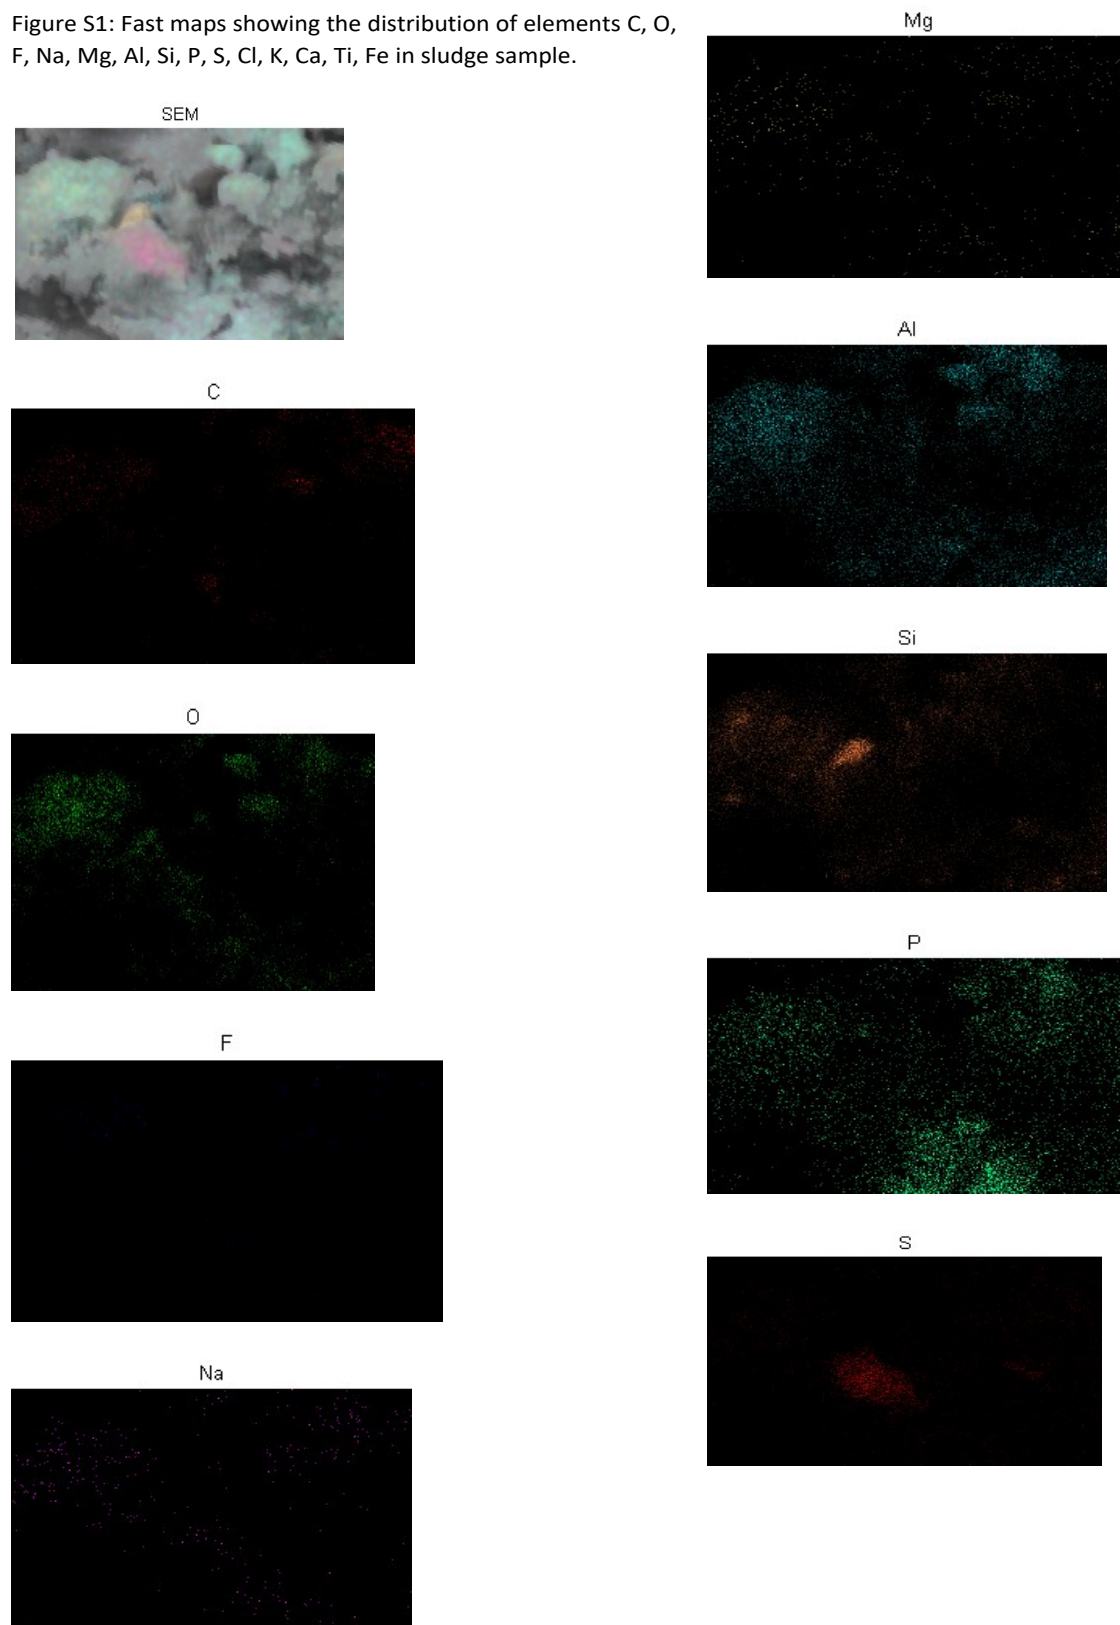

Cl

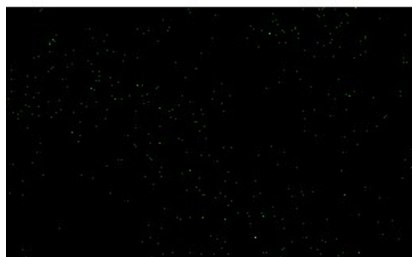

K

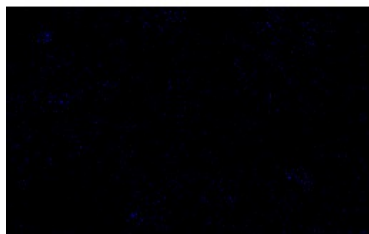

Ca

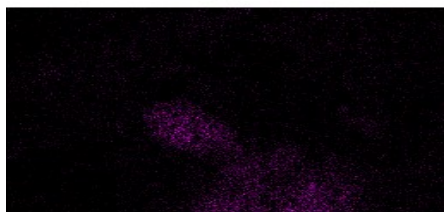

Ti

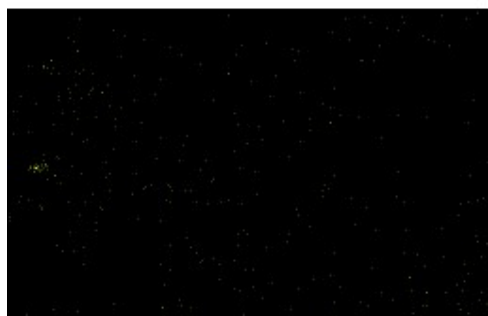

Fe

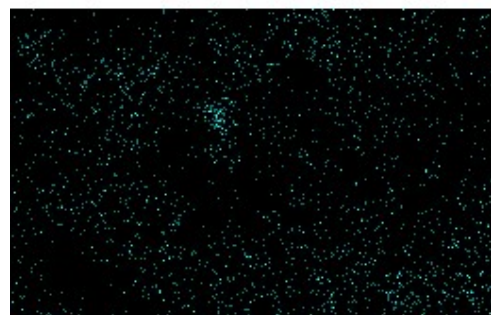

Supplement: d4va00266k1.pdf [file d4va00266k1.pdf]
